# Supplementary material for: Nitrate reduction to ammonium: from CuO defect engineering to waste NOx-to-NH3economic feasibility
Source: Royal Society of Chemistry journal article supplement (doi:10.1039/d1ee00594d), 2021-01-01
Supplement: d1ee00594d1.pdf [file d1ee00594d1.pdf]

## Supporting Information

### Nitrate Reduction to Ammonium: From CuO Defect Engineering to Waste NO<sub>x</sub>-to-NH<sub>3</sub> Economic Feasibility

Rahman Daiyan\*,<sup>1</sup> Thanh Tran-Phu,<sup>2</sup> Priyank Kumar,<sup>1</sup> Kevin Iputera,<sup>3</sup> Zizheng Tong,<sup>3</sup> Joshua Leverett,<sup>1</sup>  
5 Muhammad Haider Ali Khan,<sup>1</sup> Ali Asghar Esmailpour,<sup>1</sup> Ali Jalili,<sup>1</sup> Maggie Lim,<sup>1</sup> Antonio Tricoli,<sup>2</sup> Ru-Shi  
Liu\*,<sup>3</sup> Xunyu Lu,<sup>1</sup> Emma Lovell\*,<sup>1</sup> Rose Amal\*<sup>1</sup>

<sup>1</sup>Particles and Catalysis Research Laboratories and School of Chemical Engineering, UNSW Sydney, Sydney, NSW 2052, Australia

<sup>2</sup> Nanotechnology Research Laboratory, Faculty of Engineering University of Sydney, NSW 2006 and  
10 Nanotechnology Research Laboratory, Research School of Chemistry, College of Science, The Australian  
National University, Canberra, ACT 2601, Australia

<sup>3</sup> Department of Chemistry, National Taiwan University, Taipei 106, Taiwan

15

20

25

\* Corresponding authors

30 [r.amal@unsw.edu.au](mailto:r.amal@unsw.edu.au)

[e.lovell@unsw.edu.au](mailto:e.lovell@unsw.edu.au)

[rsliu@ntu.edu.tw](mailto:rsliu@ntu.edu.tw)

## 1. DFT Methods

35 We used the plane-wave VASP code for all our DFT calculations.<sup>1-3</sup> The core electrons in our calculations  
were treated using the projector augmented wave method (PAW) method,<sup>1</sup> and the Perdew-Burke-Ernzerhof  
(PBE) exchange-correlation functional<sup>4</sup> was employed. The cut-off value for the wavefunctions was set to 500  
eV and a gamma-point k-grid was used. Relaxation calculations ended when the residual forces on atoms were  
less than 0.03 eV/Å. A vacuum region greater than 10 Å in the direction normal to the sheets was used to  
40 avoid interactions between periodic images.

We employed a CuO (111) surface slab containing 64 Cu and 64 O atoms (a=12.70 Å, b=11.87 Å, c=23.3 Å,  
 $\alpha=73.7^\circ$ ,  $\beta=122.6^\circ$ ,  $\gamma=78.6^\circ$ , where c is the surface normal direction) to simulate NO<sub>x</sub>RR and HER active sites.  
One, two and three OV's were created to study the effect of defects on the catalytic processes (see **Figure 1c**).  
The free energy changes were computed using the computational hydrogen electrode (CHE) approach,<sup>5</sup> where

45 the free energy of ( $H^+ + e^-$ ) equals  $\frac{1}{2}H_2(g)$  for a standard hydrogen electrode (SHE). The free energy of  
various intermediates is calculated as:

$$G = E_{elec} + E_{ZPE} - TS$$

where,  $E_{elec}$  is the total electronic energy computed by DFT;  $E_{ZPE}$  is the zero-point energy (ZPE),  $T$  is  
temperature and  $S$  is entropy. For H adsorption, the change in free energy is computed as  $\Delta G = \Delta E_{elec} + 0.24$  eV,  
50 where the value 0.24 eV, taken from ref.,<sup>6</sup> includes the corrections to the ZPE and the entropy terms. For the  
NORR intermediates, the correction terms were neglected – this, however, does not affect the key conclusions  
drawn from our DFT calculations.

We avoided using the charged NO<sub>3</sub><sup>-</sup> species as a reference in our DFT calculations, while instead employing  
neutral HNO<sub>3</sub> as the gas-phase reference. The energy of NO<sub>3</sub><sup>-</sup> ion was obtained using the reference values for  
55 the ionization energy of H and the heat of reaction for HNO<sub>3</sub> (gas) deprotonation, as detailed in ref.<sup>7</sup>

## 2. Technoeconomic Modelling Methods

### A. Electrolyser Model

To model the 10 MW electrolyser system, we calculated the electrolyser area that would be required based on the performance data of pCuO-5 (**Figure 2**). This performance data is also used to calculate the overall energy and mass balance of the system. These collective data are used to establish the system capital (dependent on stack area) and operating costs (dependent on feedstock and electricity consumption). The mathematical model is represented below and is based on the framework developed by Jouny *et al*<sup>8</sup> and Jonggeol Na *et al*<sup>9</sup>. Note that we do not consider product separation, which is beyond the scope of our work.

#### 65 Electrode Area

Based on the cell voltage ( $\Delta V$ ), we can determine the amount of current that will be passing through the electrolyser stack at the applied power of 10 MW ( $P$ ). This current can then be correlated with the current density ( $j$ ) of the system to determine the required electrolyser stack area as shown below:

$$P = \Delta V \times I_o \quad (1)$$

$$I_o = \frac{P}{\Delta V} \quad (2)$$

$$A_{Stack} = \frac{I_o}{j} \quad (3)$$

Here  $P$  is the installed power rating in Watts (W),  $\Delta V$  is the cell potential in Volts (V),  $I_o$  is the current passing through the electrode in Amperes (A) and  $j$  is the current density in  $A\ m^{-2}$ .

### Mass – Energy Balance

75 To carry out a mass and energy balance, we calculate the partial current for  $NO_x$ RR and utilize this to calculate the mass flowrate of the product as follows:

$$I_p = I_o \times FE_{NH_4^+} \quad (4)$$

$$F_{NH_4^+} = \frac{I_p}{e \times F_c} \times MW_x \quad (5)$$

80 Where,  $I_p$  is the partial current for  $NH_4^+$ ,  $FE_{NH_4^+}$  is the Faradaic efficiency,  $e$  is the number of electrons transferred to generate 1 mole of  $NH_4^+$ ,  $MW_x$  is the molecular weight,  $F_c$  represents the Faraday's Constant ( $96,485\ C\ mol^{-1}$ ) and  $F_{NH_4^+}$  represents the mass flowrate of  $NH_4^+$  in  $g\ s^{-1}$ .

The  $NH_4^+$  yield is calculated as follows:

$$Y_{NH_4^+} = \frac{F_x}{A_{Stack}} \quad (6)$$

85 Where,  $F_x$  is the flowrate of  $NH_4^+$  in  $g\ h^{-1}$ ,  $A_{stack}$  represents the electrolyser stack area in  $m^2$  and the yield of  $NH_4^+$  is represented by  $Y_{NH_4^+}$  as  $g\ m^{-2}\ h^{-1}$ .

## B. Electrolyser System Cost

### Electrolyser System Capital Cost (CAPEX)

90 To determine the electrolyser capital cost, we correlate a reference area-based unit cost (\$ m<sup>-2</sup>) with the electrolyser stack area. These reference area-based costs are adopted from the US DOE H2A analysis for current distributed PEM electrolyser system<sup>10</sup>. A cost of \$342 kW<sup>-1</sup> is used for an electrolyser stack that operates at a current density of 2 A cm<sup>-2</sup> and cell voltage of 1.9 V. This reference cost for the PEM electrolyser is determined as:

95 
$$Ref_{Cost} = \frac{\$342}{kW} \times \frac{2 A}{cm^2} \times 1.9 V \times \frac{10^4 cm^2}{m^2} \times \frac{kW}{1000 W} = 12,996 \frac{\$}{m^2} \quad (7)$$

This reference cost is then used to estimate the cost of NO<sub>x</sub>RR electrolyser stack cost. For our calculations, we assume that a commercial PEM electrolyser can be easily retrofitted to operate for NO<sub>x</sub>RR. In addition, on the basis of DOE estimate, we assume that the BoP of NO<sub>x</sub>RR electrolyser will be 43% of total system cost with 57% due to stack cost.<sup>10</sup>

### 100 Electrolyser System Operating Cost (OPEX)

#### Electricity Price

For our analysis, we use electricity prices from the International Renewable Energy Agency (IRENA) and International Energy Agency (IEA) to include global weighted average electricity prices for grid supplied electricity for both fossil-based as well as for renewable power purchase agreements (PPA).<sup>11,12</sup> The grid  
105 electricity, solar PPA and wind PPA considered herein are \$97 MWh<sup>-1</sup> (97% capacity factor), \$68 MWh<sup>-1</sup> (18% capacity factor) and \$53 MWh<sup>-1</sup> (51%), respectively. For the solar and wind PPAs, the intermittency of the solar and wind generation will limit the operational capacity of the electrolyser. The capacity factor (c<sub>f</sub>) represents the ratio of the actual generation output of the energy system to the maximum output the system is rated to generate over any given timeframe.

#### 110 Nitrate Feedstock

For our modelling purposes, we consider that the NO<sub>x</sub> emissions from coal-based power plants will provide the required nitrate ions for electrolysis. Jiang et al. carried out an analysis of a solvent based system to capture emissions from the flue gas mixture (containing 250 ppm NO<sub>x</sub>).<sup>13</sup> The system was designed to capture 99% of NO<sub>x</sub> present in 560 ton h<sup>-1</sup> flue gas by dissolving the NO<sub>x</sub> in NaClO<sub>2</sub> solvent to produce nitric acid (NO<sub>3</sub><sup>-</sup>  
115 ions), which can then be recovered with high purity and concentration via heating at 55°C at atmospheric pressure. To simplify, we assume NO<sub>3</sub><sup>-</sup> concentration recovered from the capture unit matches the requirement for the electrolyser. Jiang et al. estimated the capture cost to be \$46.2 per tonne of CO<sub>2</sub> captured (inclusive of pressure, temperature and compression requirements), hence we used this basis to determine the NO<sub>x</sub> capture cost using the molar balance of the flue gas, calculated as \$315 per ton.

#### 120 Flue Gas System Capture Cost:

**Reference Capture Cost** = \$46.2 ton<sub>CO2</sub><sup>-1</sup>

**Molar Balance of Captured Flue Gas:**

**Total Flue Gas Flowrate** = 560 ton<sub>CO2</sub> hr<sup>-1</sup>

*Note: For Simplification we assume that the CO<sub>2</sub> flowrate is the flowrate of total flue gas.*

125 **Molar Flow Rate of Flue Gas** = 12,727,272.73 mol hr<sup>-1</sup> (@44.01 g mol<sup>-1</sup> of CO<sub>2</sub>)

**Molar Flowrate of NO<sub>x</sub> in Captured Flue Gas:**

**Molar Flowrate of NO<sub>x</sub>** = 3,181.82 mol hr<sup>-1</sup> (@250 ppm of NO<sub>x</sub> = 0.025% by vol.)

**Molar Flowrate of NO<sub>x</sub>** = 0.15 ton hr<sup>-1</sup> (@46.01 g mol<sup>-1</sup> of NO<sub>2</sub>)

Capture Cost of NO<sub>x</sub>:

130 **NO<sub>x</sub> Capture Cost** = \$46.2/0.15 = 315 \$ per ton NO<sub>x</sub>.

### Water Feedstock

A water cost of \$0.02 L<sup>-1</sup> is considered for our study.<sup>8</sup>

### Electrolyser Maintenance

135 We assume that the electrolyser operation and maintenance cost (O&M) is 3.2% of the electrolyser capital cost per year. We also consider that the PEM electrolyser stacks have a limited life of 60,000 hours after which it must be replaced, at a cost of 15% of the electrolyser system cost.<sup>10</sup> Depending on the capacity factor the electrolyser is operated, these 60,000 hours were distributed over the operational years (e.g. for grid system at a capacity factor of 97%, the stack replacement will be due after every 7 years of operation).

## **C. Economic Opportunity with NO<sub>x</sub>RR**

140 The scalability of NO<sub>x</sub>RR depends on the availability of NO<sub>x</sub> feedstock. Recent reports by the environmental agencies of United States and Australia reveal NO<sub>x</sub> emissions of ~3,000 kton yr<sup>-1</sup> (for US in 2019)<sup>14</sup> and 521 kton yr<sup>-1</sup> (for Australia in 2020),<sup>15</sup> from power plants and industry. In fact, even under the most optimistic energy infrastructure transition to a clean energy scenario, IEA projects that 10% of global energy supply in 2040 will be from coal power plants, which is a major NO<sub>x</sub> emitter.<sup>16</sup> Apart from power sector, industry such as steelmaking and cement kilns are point sources of NO<sub>x</sub>.<sup>17–19</sup> IEA has projected that ~21.7 Mt of NO<sub>x</sub> emissions were generated by industry sources in 2015.<sup>20</sup> Non-conventional sources such as wastewater and agricultural waste are also NO<sub>x</sub> sources due to biological activity and fertilizer decomposition in soil, respectively.<sup>21</sup> Further, the emerging hydrogen economy is seeing increased deployment of renewable ammonia as fuel for combustion (co-fired with coal), which can generate NO<sub>x</sub> as byproduct from partial oxidation.<sup>22,23</sup> These statistics and market direction clearly outline significant opportunity in implementing NO<sub>x</sub>RR for environmental mitigation, generate fuels and enable a circular economy.

Another aspect to improving the economics of this P2X pathway would be the NO<sub>x</sub> feedstock costs and this has been overlooked by other recent studies.<sup>24,25</sup> Though a robust model for NO<sub>x</sub> capture system costs was not included in the scope of our work, we provide an analysis on LC<sub>NH4</sub><sup>+</sup> at different possible NO<sub>x</sub> costs (Figure S10a). This reduction in NO<sub>x</sub> feedstock cost can be attained through improvement in capture technologies such as gas scrubbing and pressure swing adsorption.<sup>26</sup> In addition, the eventual cost of NO<sub>x</sub> capture will also depend on the NO<sub>x</sub> levels in the flue gas. Whilst we do not analyse this effect of NO<sub>x</sub> concentration on capture cost, similar analysis with carbon capture technologies shows that CO<sub>2</sub> concentration in flue gas greatly dictates eventual capture costs for gas scrubbing and adsorption.<sup>27,28</sup> Thus, future work should focus on identifying key high concentration NO<sub>x</sub> sources and how that may influence NO<sub>x</sub>RR. Nevertheless, the cost of systems for NO<sub>x</sub> abatement similar to other carbon capture technology are projected to experience rapid cost reductions with learning rates of 10 – 12% expected.<sup>29</sup>

### 3. Supporting Figures

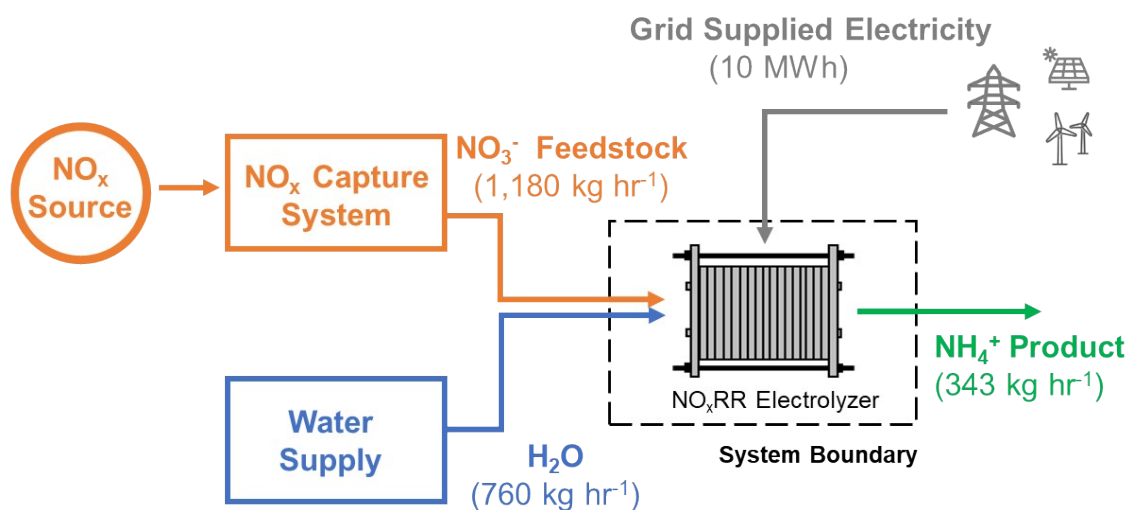

165 **Figure S1.** Process flowsheet considered for economic modelling. Note that the key focus of this work is in evaluating the improvement in NO<sub>x</sub>RR feasibility as a Renewable Power-to-X pathway to generate green NH<sub>3</sub> from improvement in catalysis performance through oxygen vacancy engineering. NO<sub>x</sub>, water and electricity are considered as feedstock inputs and the values will change for different cell voltage and current density.

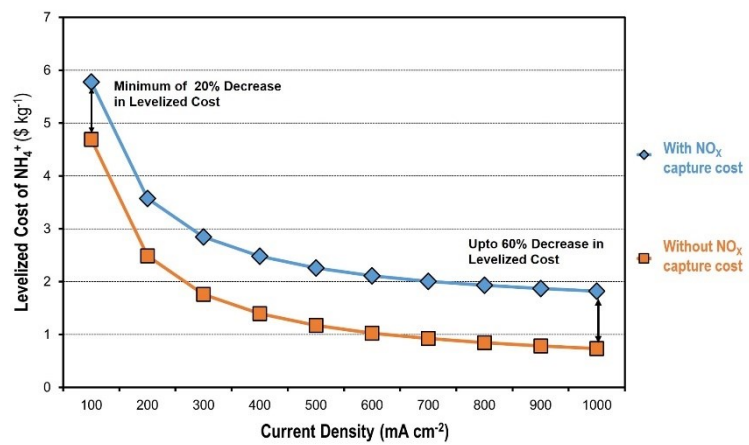

**Figure S2.** Impact of levelized cost of  $\text{NH}_4^+$  as a function of  $\text{NO}_x$  capture cost and current density at an electricity cost of \$97  $\text{MWh}^{-1}$  and electrolyser capacity factor of 97% operating at a cell voltage of 2.2 V. From these results, it is clear that  $\text{LC}_{\text{NH}_4^+}$  can be reduced if  $\text{NO}_x$  capture costs can be improved through R&D or by combining  $\text{CO}_2$  and  $\text{NO}_x$  capture in a single hub to take advantage of economics of scale. Note that this analysis was carried out with the assumption of  $\text{NH}_4^+$  production rate of 600  $\text{g m}^{-2} \text{h}^{-1}$  (DOE target).

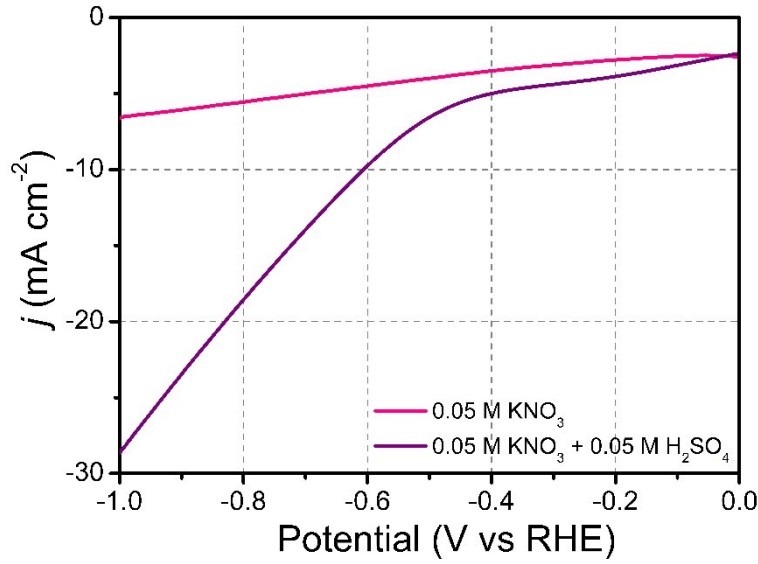

**Figure S3.** Optimization of electrolyte for NO<sub>x</sub>RR with background Cu Foam electrode. The polarization curves indicate an improvement in  $j$  with a slight addition of H<sub>2</sub>SO<sub>4</sub>. This addition of acid improves the ionic conductivity of the electrolyte as well as providing H<sup>+</sup> ions that are necessary for the NO<sub>3</sub><sup>-</sup> to NH<sub>4</sub><sup>+</sup> reaction mechanism:

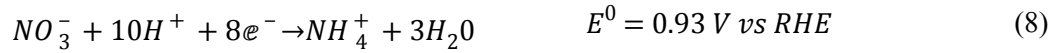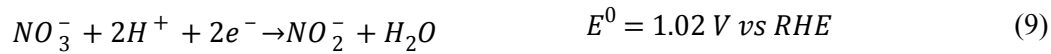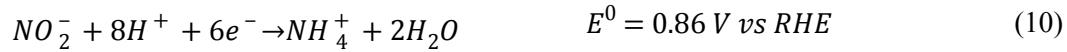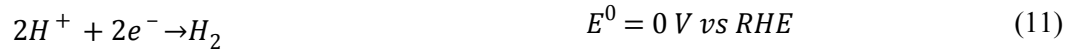

A suitable amount of H<sup>+</sup> can facilitate the hydrogenation of \*NO to \*NOH and subsequent hydrogenation of \*NOH to \*NH<sub>2</sub>OH that is then converted to \*NH<sub>4</sub><sup>+</sup>. Our control experiments with Cu foam reveal that in absence of acid, the NH<sub>4</sub><sup>+</sup> yield decreases significantly from 35 μmolcm<sup>-2</sup>h<sup>-1</sup> (in presence of acid) to 7 μmolcm<sup>-2</sup>h<sup>-1</sup> (no acid) during electrolysis at -0.8 V, confirming that the acid provides both protons and chemical bias for the NO<sub>x</sub>RR reaction. Note that a higher concentration of acid leads to decreased NH<sub>4</sub><sup>+</sup> selectivity owing to competing hydrogen evolution reaction (HER).<sup>30</sup>



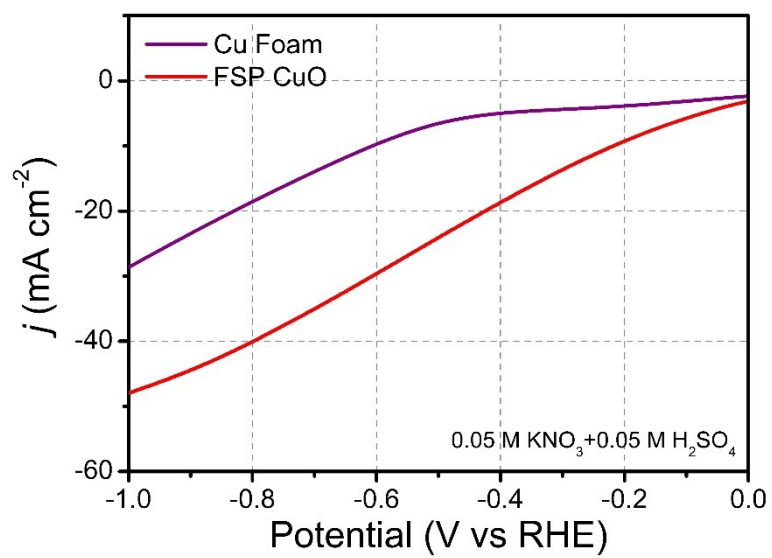

190

**Figure S4.** NO<sub>x</sub>RR polarization curves for FSP CuO and Cu Foam in 0.05M KNO<sub>3</sub>+0.05 M H<sub>2</sub>SO<sub>4</sub>. The curves reveal a higher  $j$  with FSP CuO when compared to background Cu Foam.

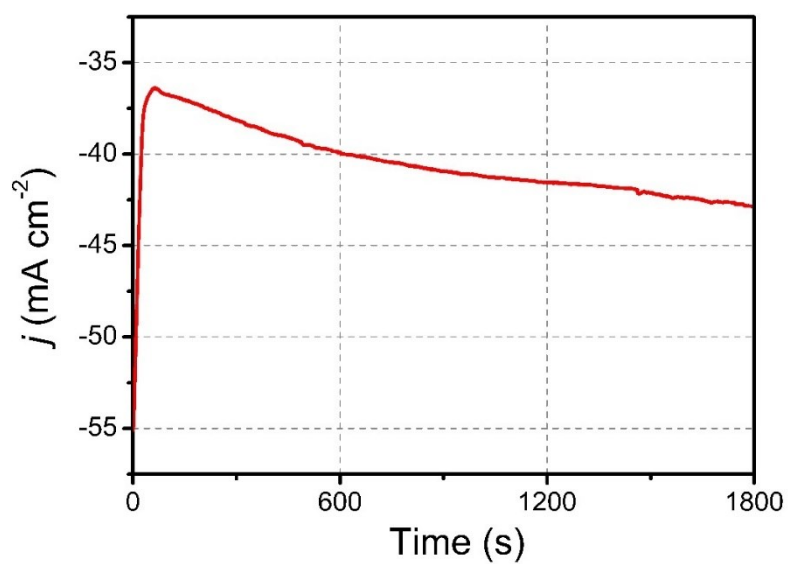

195 **Figure S5.** Representative chronoamperometric  $i$ - $t$  curve for FSP CuO at -0.8 V for 30 minutes electrolysis duration in 0.05M KNO<sub>3</sub>+0.05 M H<sub>2</sub>SO<sub>4</sub>. Note that there is a slight change in  $j$  arising from consumption of NO<sub>3</sub><sup>-</sup> and H<sup>+</sup> and formation of NH<sub>4</sub><sup>+</sup>, thereby changing electrolyte conditions.

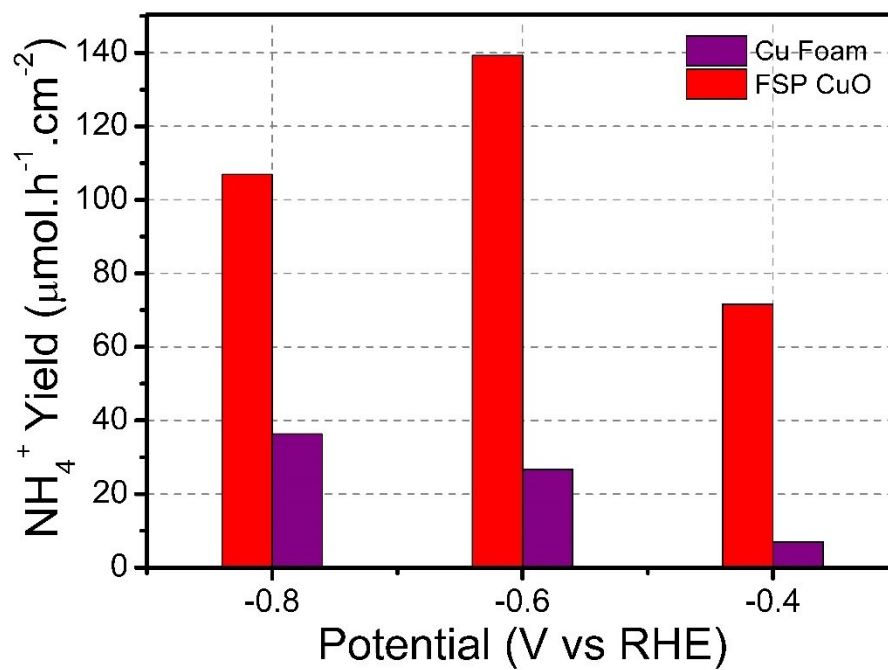

**Figure S6.** Dependence of  $\text{NH}_4^+$  yield on applied potential for FSP CuO and Cu Foam in 0.05M  $\text{KNO}_3$ +0.05 M  $\text{H}_2\text{SO}_4$ . The results reveal a much higher  $\text{NH}_4^+$  yield with FSP CuO when compared to Cu Foam.

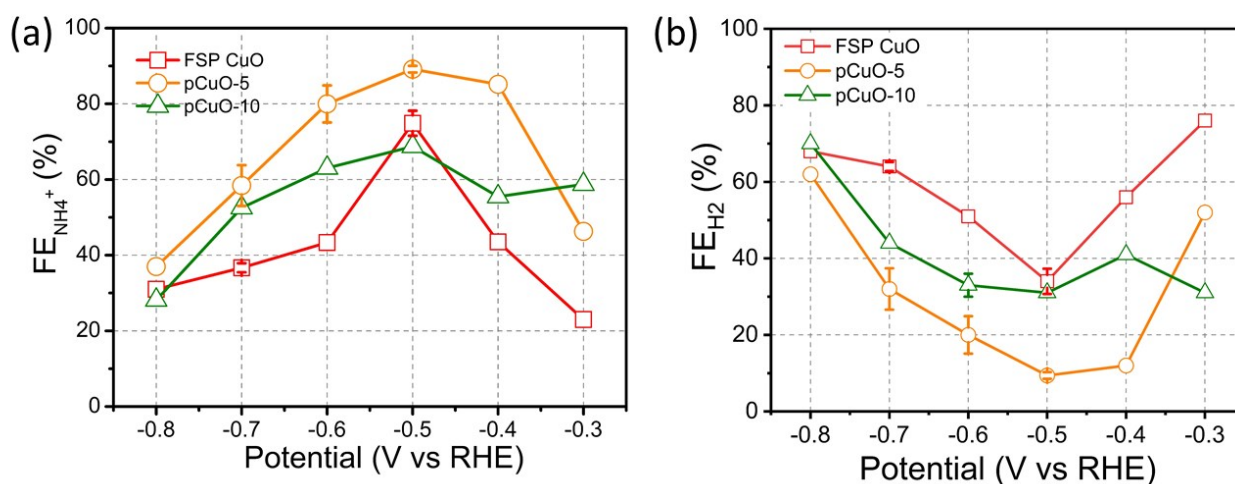

205 **Figure S7.** Dependence of **(a)**  $\text{FE}_{\text{NH}_4^+}$  and **(b)**  $\text{FE}_{\text{H}_2}$  on applied potentials for FSP CuO, pCuO-5 and pCuO-  
 10 in 0.05M  $\text{KNO}_3$ +0.05 M  $\text{H}_2\text{SO}_4$ . The trends reveal that suitable plasma treatment of 5 minutes with FSP  
 CuO is leading to an improvement in  $\text{FE}_{\text{NH}_4^+}$  and a decline in  $\text{FE}_{\text{H}_2}$ . Further increase in plasma duration to 10  
 minutes leads to a decrease in  $\text{FE}_{\text{NH}_4^+}$ . The maximum  $\text{FE}_{\text{NH}_4^+}$  of FSP CuO, pCuO-5 and pCuO-10 are 72%,  
 89% and 69% at an applied potential of -0.5 V vs RHE, respectively. Note that apart from  $\text{H}_2$ , we do not  
 210 observe any other byproduct.

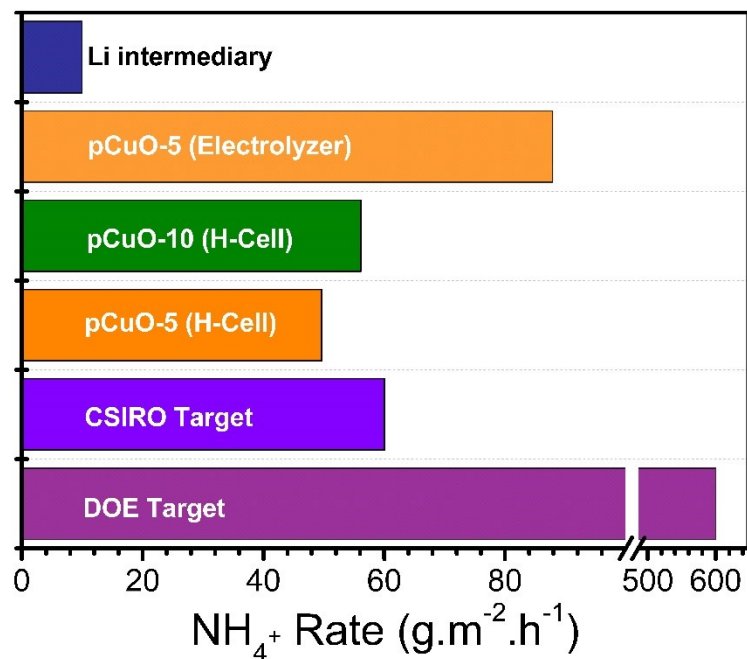

**Figure S8.** Benchmarking of  $\text{NH}_4^+$  yield activity with DOE and CSIRO target (for eNRR) and literature for intermediary  $\text{NH}_3$  pathways. It is clear that  $\text{NH}_4^+$  yield with pCuO-5 is higher than best-reported Li intermediary performance and the CSIRO target. Note that the performance is lower than the DOE target, highlighting further opportunity with catalyst design.<sup>31–33</sup> Note: that there are no current benchmarks set for direct nitrate reduction to ammonia pathway.

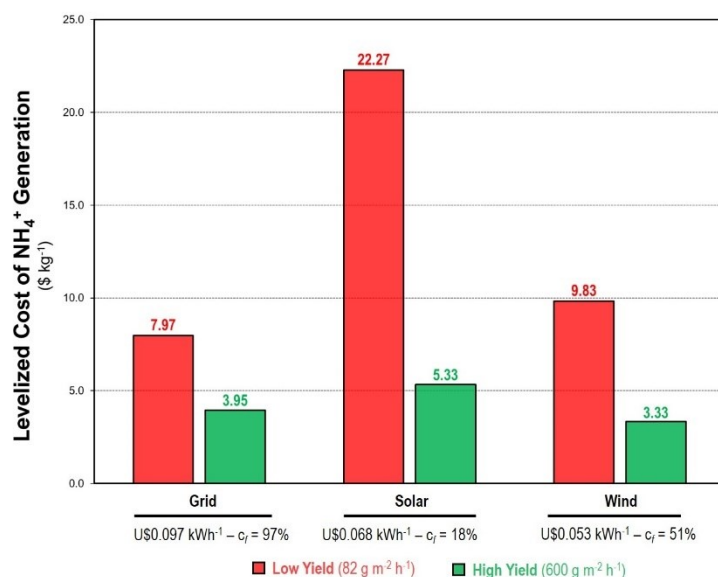

220 **Figure S9.** Levelized cost of  $\text{NH}_4^+$  under different global electricity supply configurations. At low yield (pCuO-5 results), the grid PPA configuration is the most economical scenario for operating  $\text{NO}_x\text{RR}$  system whereas for the high yield scenario, wind driven electrolyser configuration presents the lowest  $\text{LC}_{\text{NH}_4^+}$ .

**Note:** the variation in levelized costs among the different configuration results from changing electricity pricing and capacity factor, which affect the amount of  $\text{NH}_4^+$  being generated. For pCuO-5, the levelized cost for  $\text{NH}_4^+$  generation can be reduced by increasing the absolute amount of  $\text{NH}_4^+$  being generated by operating the electrolyser at a higher capacity factor, even at a higher electricity price. For this reason, the  $\text{LC}_{\text{NH}_4^+}$  for pCuO-5 attained with grid configuration presents the lowest cost. In comparison, for target yield catalyst (production rate of  $600 \text{ g m}^{-2}\text{h}^{-1}$ ), the  $\text{LC}_{\text{NH}_4^+}$  is more influenced by electricity pricing and therefore operating the electrolyser with wind PPA, which presents the lowest electricity pricing and moderate capacity factors (~51%) presents a lower  $\text{LC}_{\text{NH}_4^+}$  than compared to grid (with high price but high capacity factor).

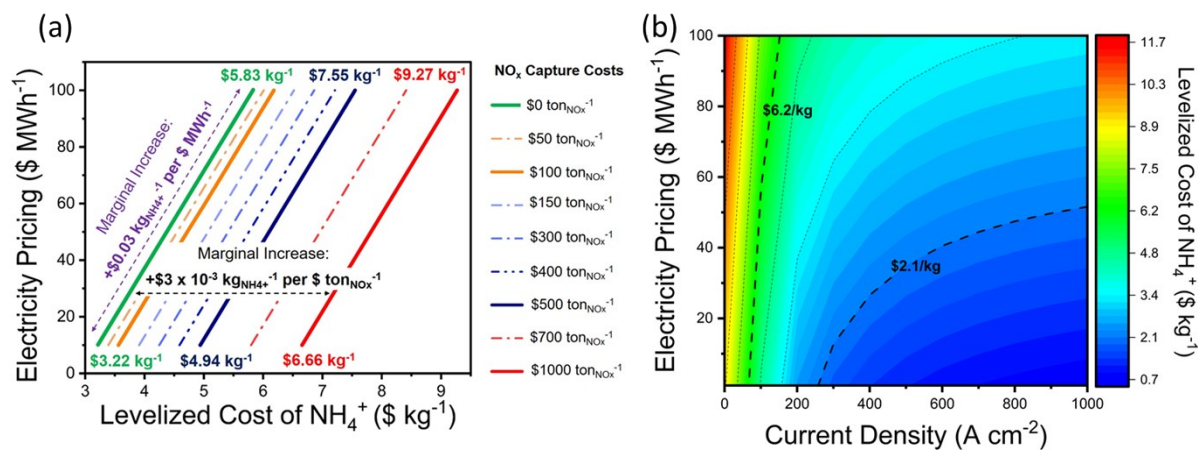

**Figure S10. (a)** The influence of  $\text{NO}_x$  capture costs on  $\text{LC}_{\text{NH}_4^+}$ . The analysis was conducted for a fixed cell voltage of 2.2 V and current density of 150  $\text{mA cm}^{-2}$  at under the technoeconomic assumptions. The shown  
 235 marginal increase represents the change in  $\text{LC}_{\text{NH}_4^+}$  ( $\$ \text{kg}_{\text{NH}_4^+}^{-1}$ ) per unit increase in electricity price (Purple dotted line) and  $\text{NO}_x$  feedstock costs (Black dotted line). As observed the cost of electricity plays a more dominating role on the  $\text{LC}_{\text{NH}_4^+}$  when compared to the  $\text{NO}_x$  feedstock costs. **(b)** Economic modelling of  $\text{NO}_x$  conversion to  $\text{NH}_4^+$  using pCuO-5 in a 10 MW electrolyser system (without  $\text{NO}_x$  capture costs).

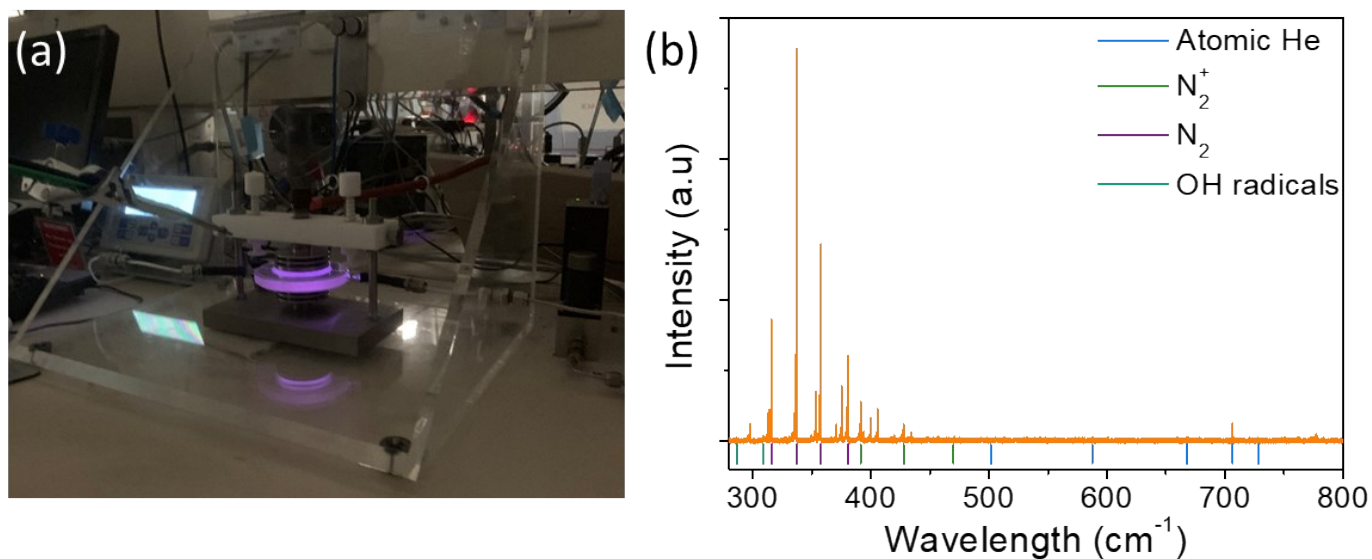

**Figure S11.** (a) Digital image of *in-situ* OES measurements. (b) *In-situ* OES spectra during plasma-treatment of FSP CuO for 10 minutes.



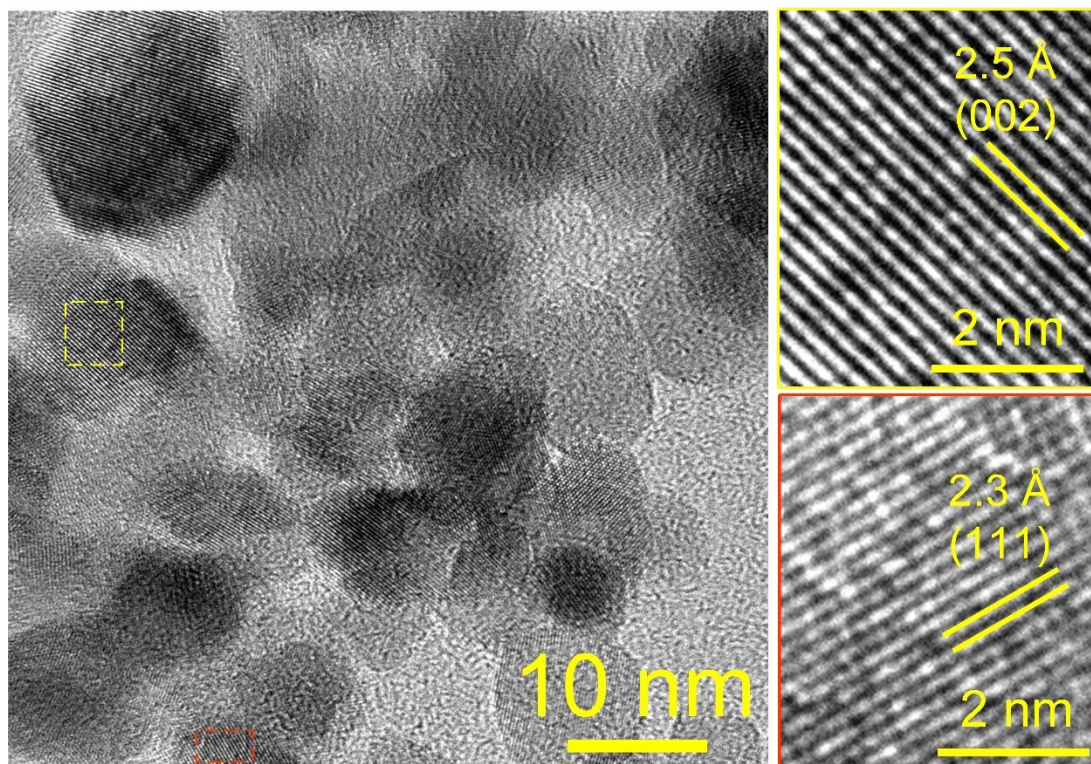

**Figure S12.** TEM and HRTEM images of FSP CuO. The TEM image reveals formation of anisotropic particles with a particle size of  $\sim 10$  nm. The corresponding HR-TEM images reveal lattice fringes indicating the formation of CuO  $\{111\}$  and  $\{002\}$  facets.

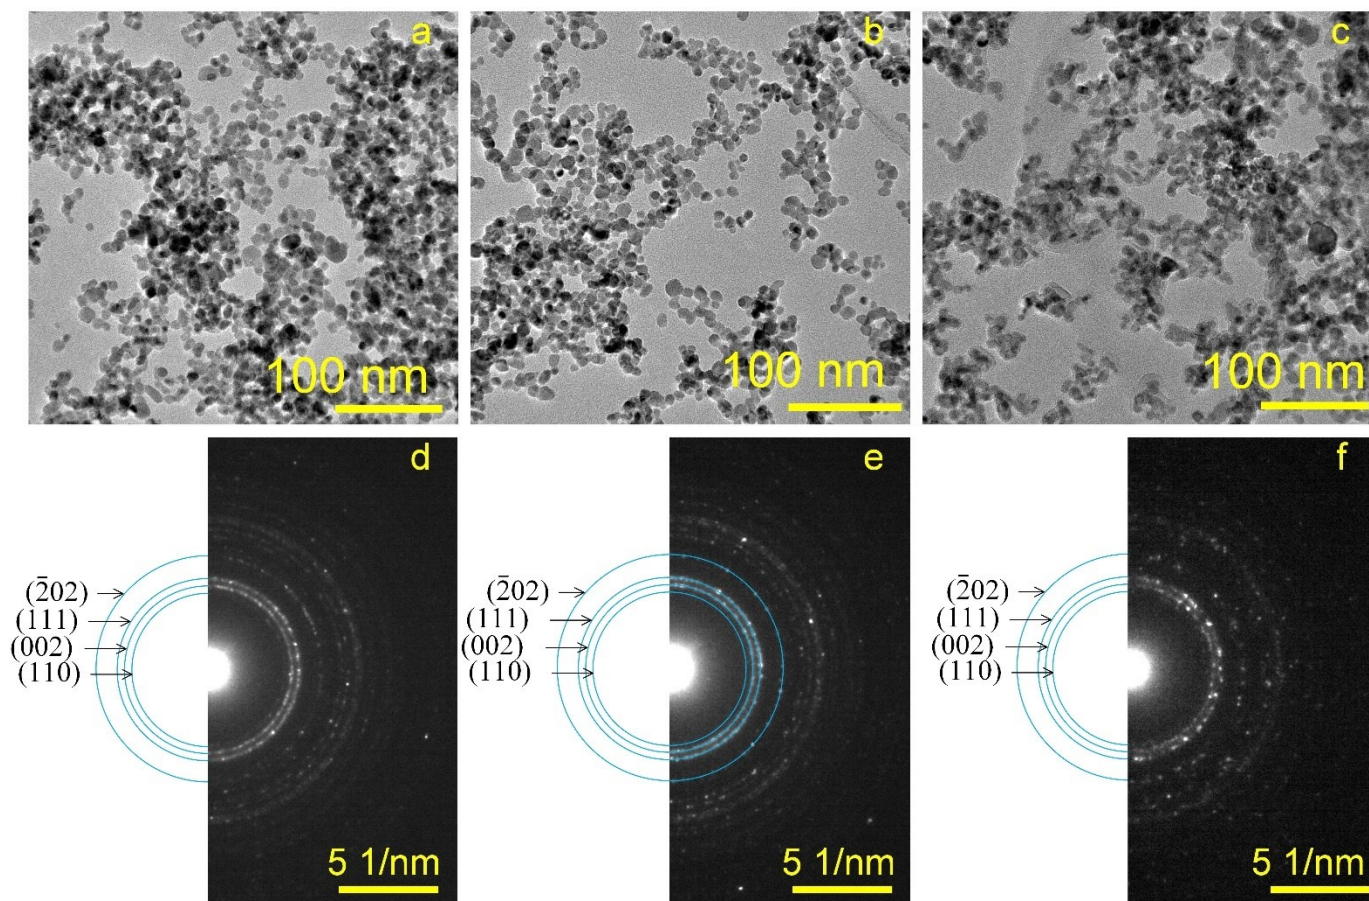

**Figure S13.** TEM images and corresponding selected electron area diffraction pattern for **(a,d)** FSP CuO, **(b,e)** pCuO-5 and **(c,f)** pCuO-10. The intensity of electron diffraction patterns for pCuO-10 is lower than that attained with pCuO-5.



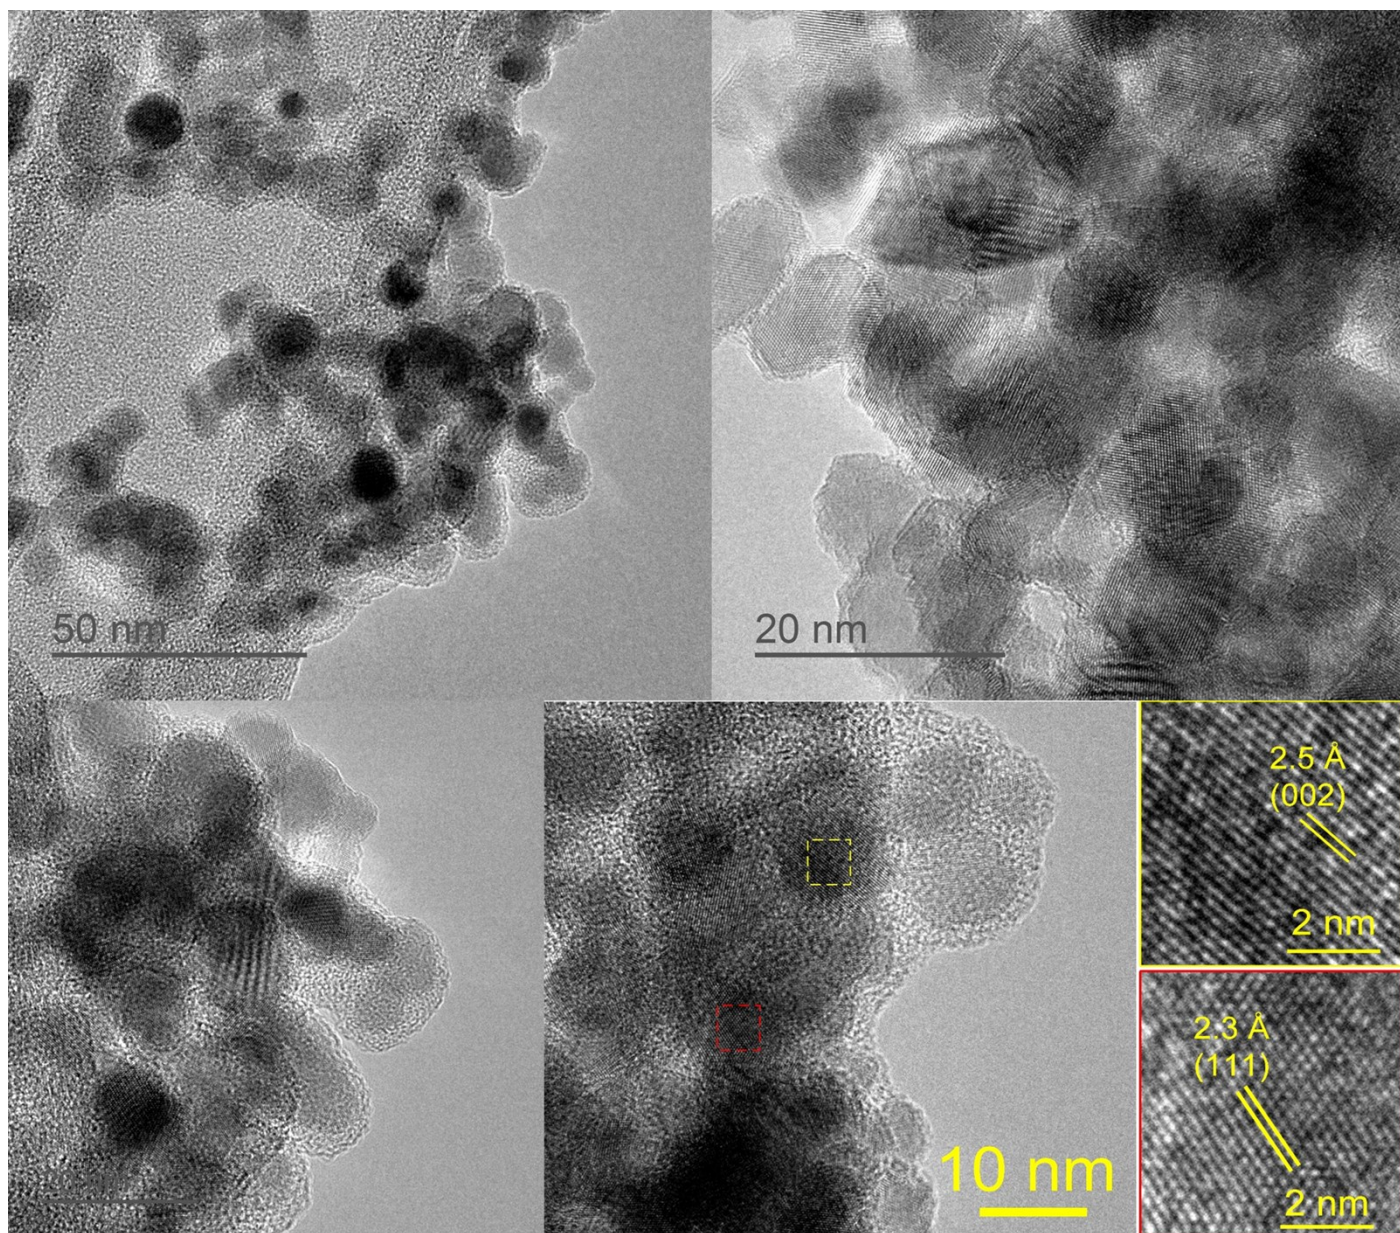

**Figure S14.** TEM and HR-TEM image of pCuO-10. The surface of the catalyst is less crystalline (compared to FSP CuO and pCuO-5).



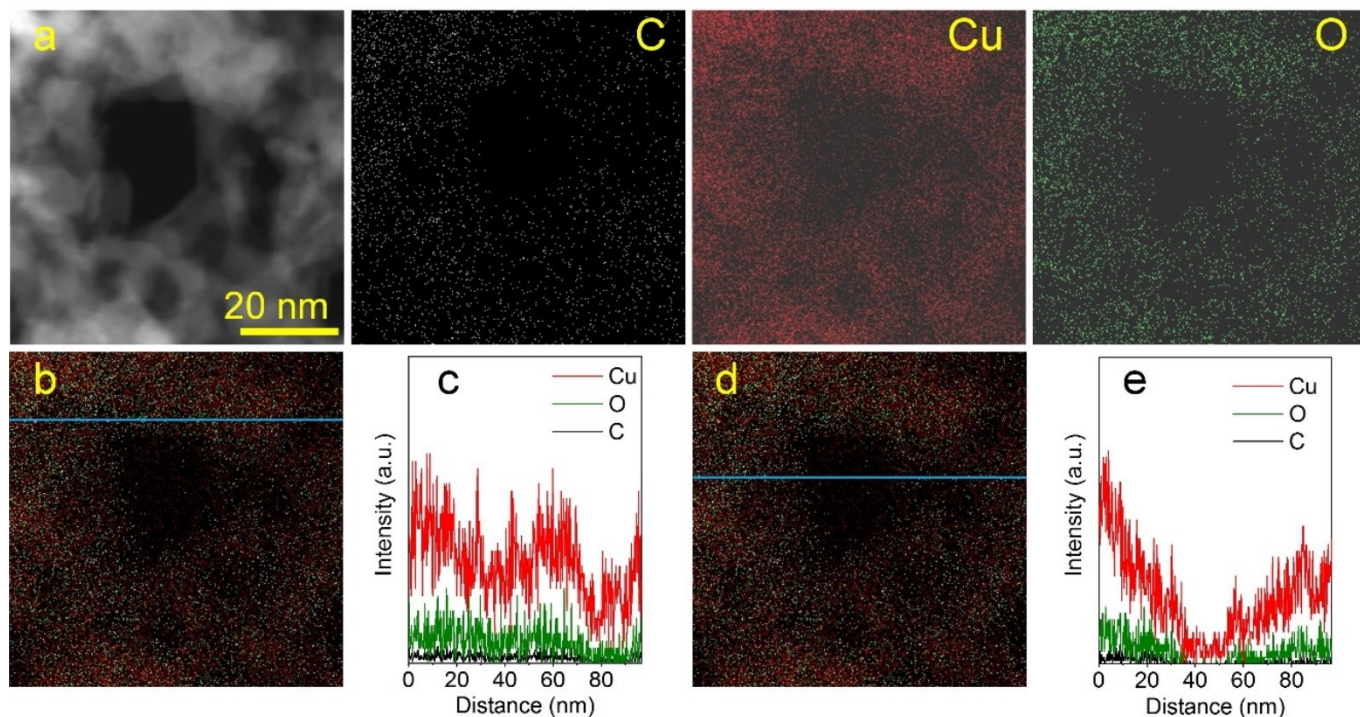

**Figure S15.** EDX mapping of pCuO-10. **(a)** TEM imaging and corresponding EDX mapping showing the presence of Cu, O and C. **(b,d)** Line scan direction from left to right and the **(c,e)** corresponding spectra. Note that the presence of C can be from the background as well as residual C moieties generated during FSP synthesis.

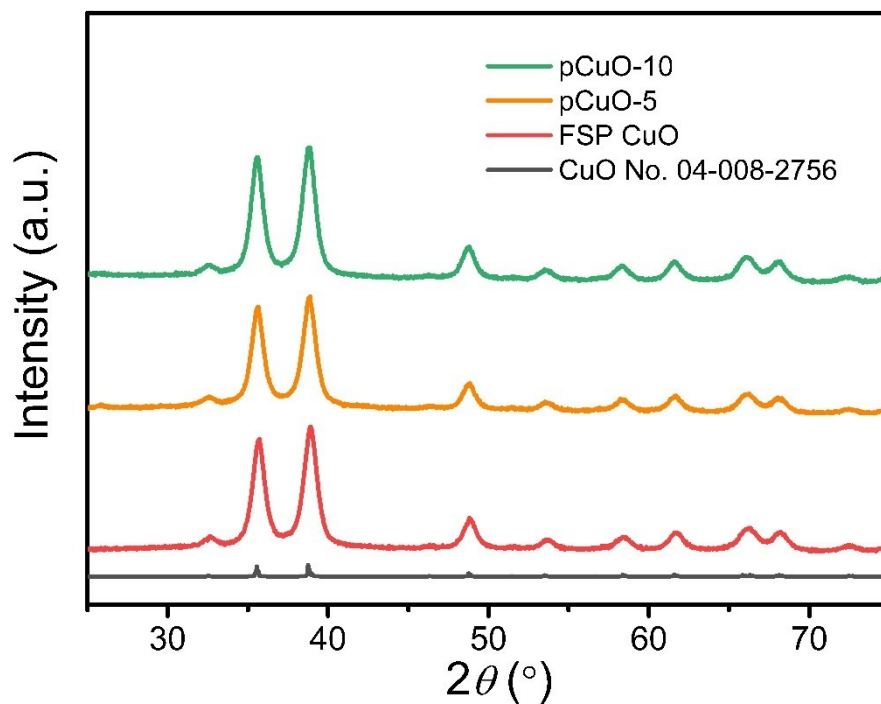

**Figure S16.** XRD patterns for FSP CuO, pCuO-5 and pCuO-10. The XRD patterns with FSP CuO, pCuO-5 and pCuO-10 revealed major peaks at 32°, 35°, 38.8°, 48.7°, 66° and 68°, which correspond to the {110}, {002}, {111}, {202}, {311} and {220} reflections of CuO (JCPDS 04-008-2756). The XRD patterns reveal a similar bulk crystallinity for all the catalysts.

270

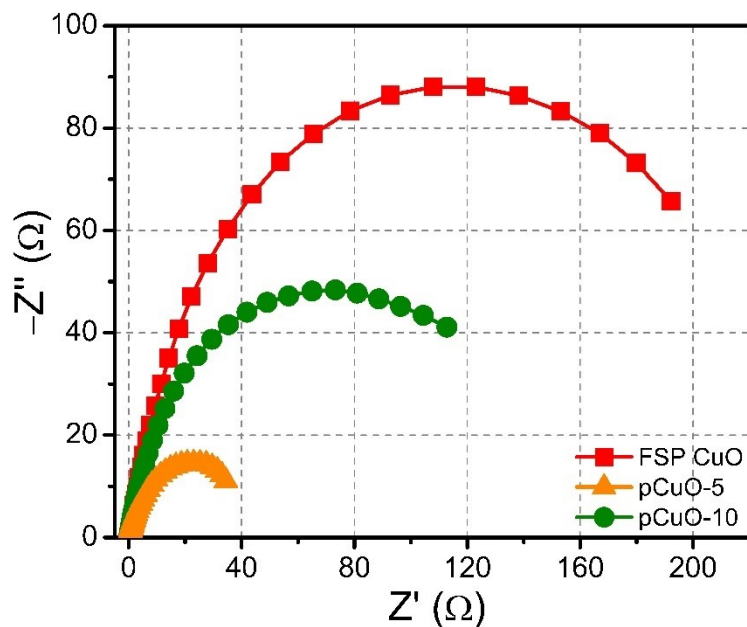

**Figure S17.** EIS measurements of FSP CuO, pCuO-5 and pCuO-10 at 0.4 V vs RHE in 0.5 M Na<sub>2</sub>SO<sub>4</sub>. The Nyquist plots indicate that the radius of the semicircle decreases with 5 minutes of plasma-treatment, indicating that the system impedance (electrode conductivity and charge transfer resistance) is improved. However, increasing plasma-treatment duration to 10 minute leads to an increase in system impedance compared to pCuO-5.

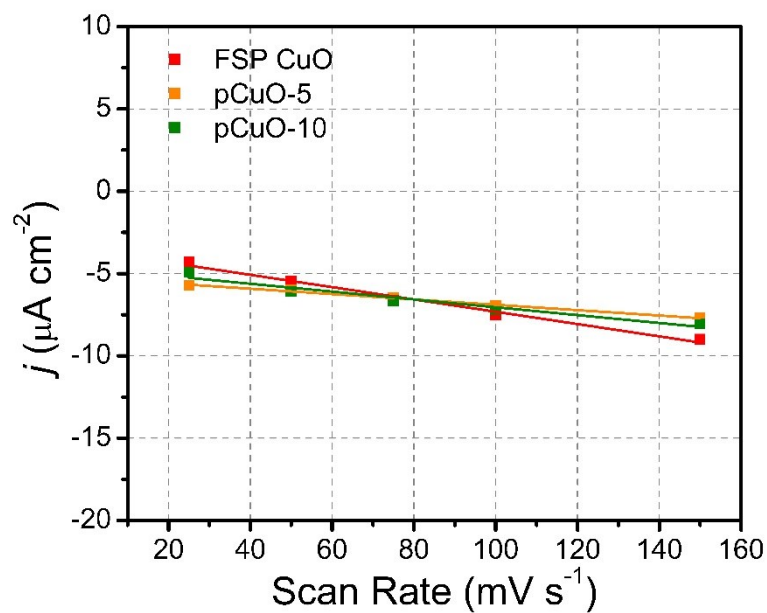

**Figure S18.** Capacitive current vs scan-rate plots at an applied potential of 0.375 V vs RHE in 0.5 M  $\text{Na}_2\text{SO}_4$  for FSP CuO, pCuO-5 and pCuO-10. The results reveal a similar electrochemical surface area (ECSA) for all the catalysts.

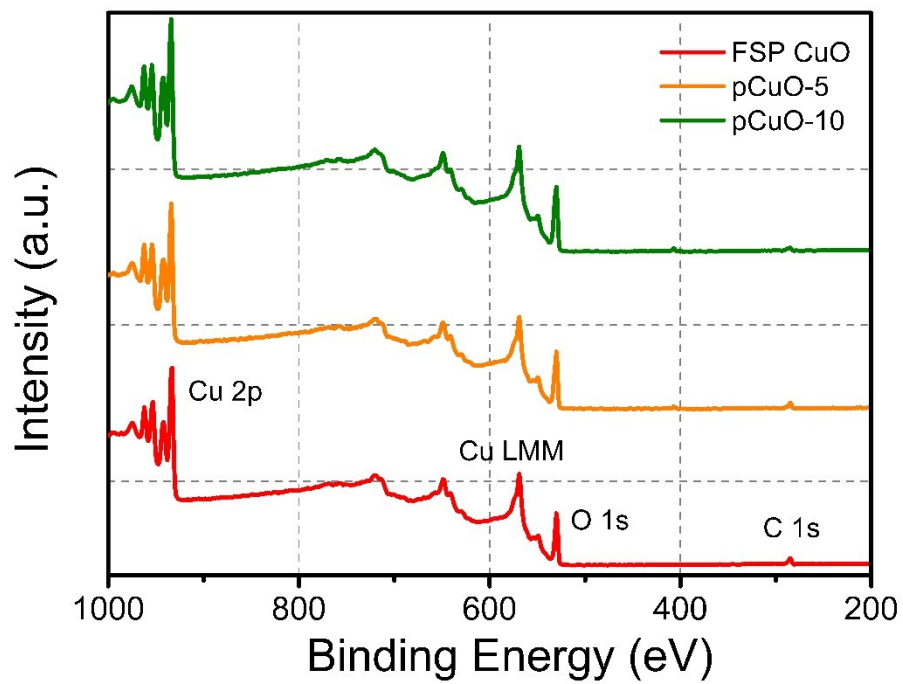

**Figure S19.** XPS line survey for FSP CuO, pCuO-5 and pCuO-10. It is clear from these results that the samples  
 285 comprise of Cu and O as well as background C species.



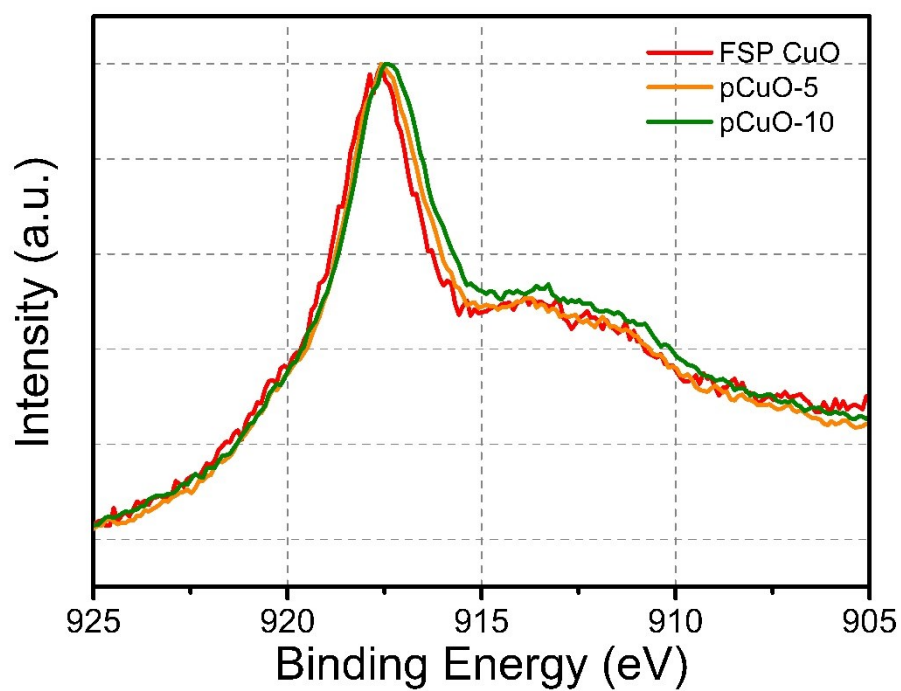

**Figure S20.** AES profile for FSP CuO, pCuO-5 and pCuO-10. The summation of kinetic energy from AES and summation of binding energy for peaks from high-resolution Cu 2p spectra indicate that the predominant oxidation state on the surface of all the catalyst is  $\text{Cu}^{2+}$ .<sup>34</sup>

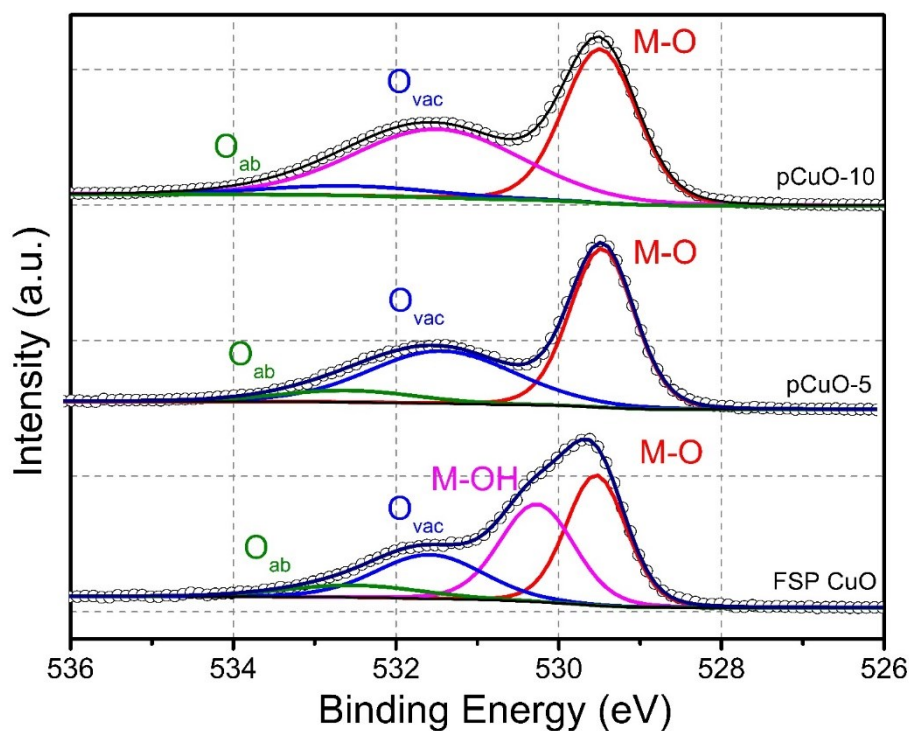

**Figure S21.** High-resolution O1s spectra for FSP CuO, pCuO-5 and pCuO-10. M-O, M-OH,  $O_{vac}$  and  $O_{abs}$  refer to metal-oxygen, metal-hydroxide, signals arising from oxygen vacancy and absorbed oxygen, respectively. We note that all catalysts display prominent peak at binding energy 529.5 eV that corresponds to formation of  $Cu^{2+}$  within the catalysts. FSP CuO displays a peak at binding energy 530.7 eV that correspond to presence of  $Cu(OH)_2$ , which transforms to oxide moieties during plasma treatment. Given that XRD patterns do not indicate any peaks corresponding to  $Cu(OH)_2$ , we believe this hydroxide species formed during FSP to be of thin layer/amorphous nature and it transforms to oxide moieties during plasma-treatment.<sup>35</sup>

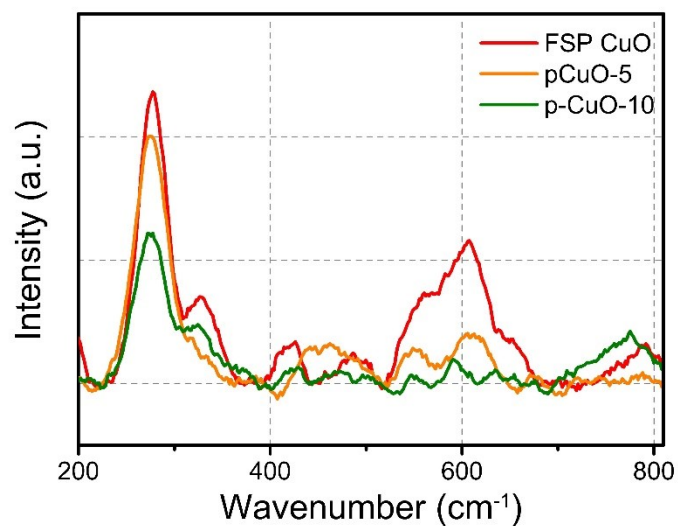

**Figure S22.** Raman spectra for FSP CuP, pCuO-5 and pCuO-10. The Raman spectra reveals a sharp peak at wavenumber  $290\text{ cm}^{-1}$  which corresponds to  $A_g$  vibration modes of CuO as well as peaks at  $328\text{ cm}^{-1}$  and  $608\text{ cm}^{-1}$  that correspond to  $B_g$  vibration modes of CuO.

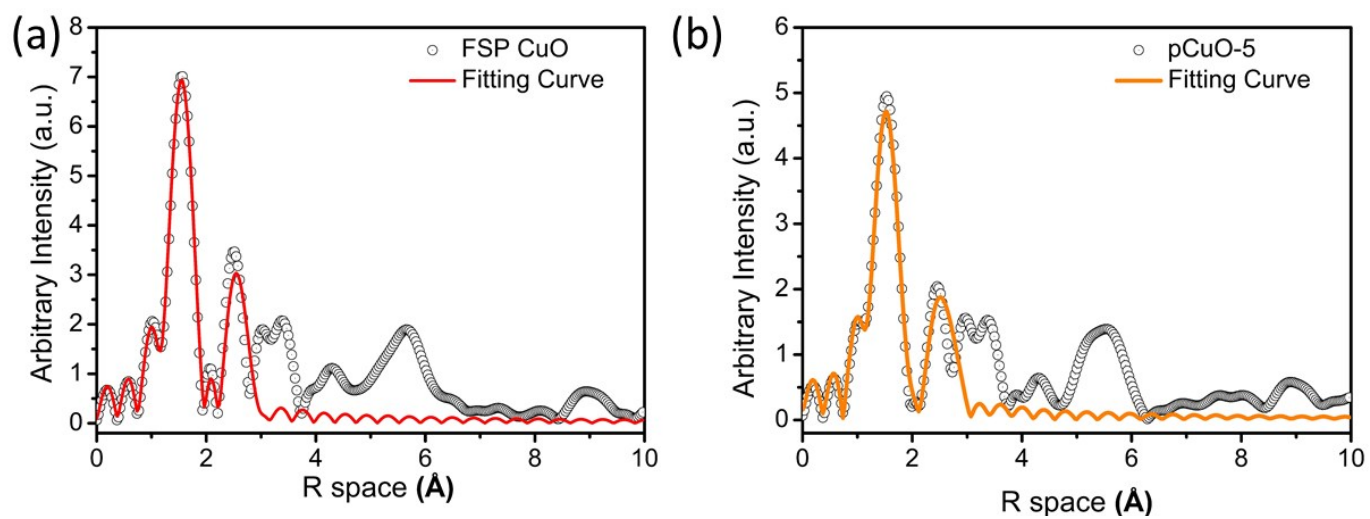

**Figure S23.** Fitting results for (a) FSP CuO and (b) pCuO-5.

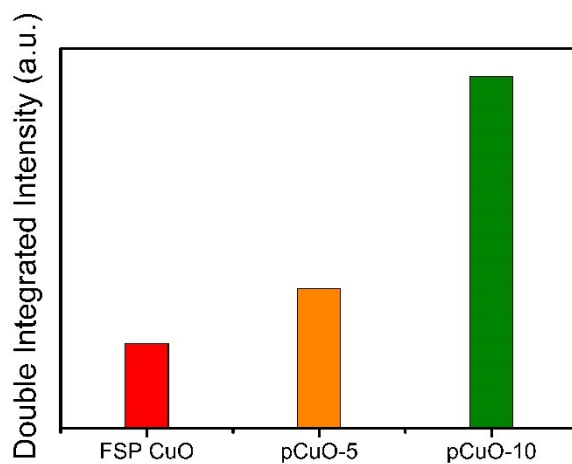

310 **Figure S24.** Double integrated intensity of EPR spectra for FSP CuO, pCuO-5 and pCuO-10 at g value of 2.002. Note that the experimental EPR spectrum is the first derivative of absorption with respect to the applied magnetic field. We carry out double integration to estimate the area under the EPR signal and this is proportional to the number of spins and amount of defects.<sup>36</sup>

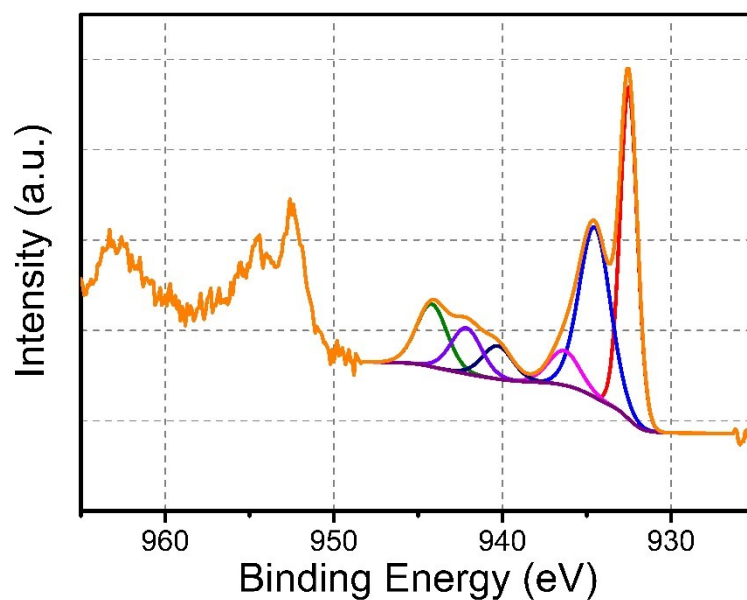

315 **Figure S25.** High-resolution Cu 2p XPS spectra for post-reaction pCuO-5 electrode. The spectra reveal the formation of  $\text{Cu}_2\text{O}$  on the surface of the electrode owing to the negative bias applied during  $\text{NO}_x\text{RR}$  and are in agreement with *operando* Raman measurements (**Figure 4b**). Note: the surface of the electrode is prone to oxidation and for testing, the post-reacted electrode was kept in a desiccator prior to XPS measurements.

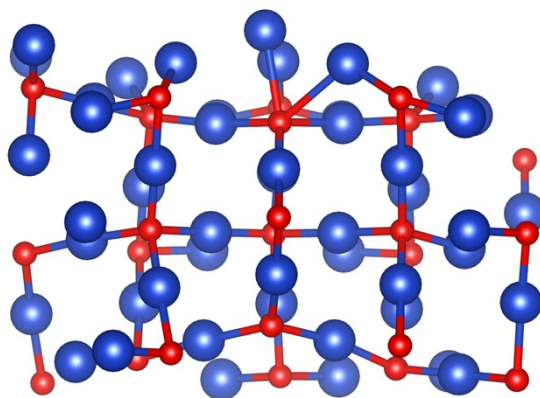

**Figure S26.** Pristine Cu<sub>2</sub>O (111) terminated model used for DFT modelling.

#### 4. Supporting Tables

Table S1 summarizes the technoeconomic parameters used in this study which is used to calculate the levelized cost of ammonium generated as our techno-economic metric, as shown in the equation below:

$$\text{Levelized Cost of Ammonium} \left( \frac{\$}{\text{kg}} \right) = \frac{R_f \times (\text{CAPEX}) + \text{OPEX}}{\text{Product Generated}} \quad (12)$$

Here,  $R_f$  represents the capital recovery factor, the CAPEX and OPEX represent the capital and operating costs of the electrolyser system.

**Table S1.** Technoeconomic Parameters

| Parameter                          | Assumption                                                  |
|------------------------------------|-------------------------------------------------------------|
| <u>Economic Parameters</u>         |                                                             |
| Currency Basis                     | USD\$ - 2020                                                |
| Project Life                       | 20 years                                                    |
| Recovery Factor                    | 0.08% (For a nominal weighted average capital cost of 4.5%) |
| <u>Electrolyser System</u>         |                                                             |
| Electrolyser Power                 | 0.1 – 10 MW                                                 |
| Current Density                    | 0 – 1000 mA cm <sup>-2</sup>                                |
| Voltage                            | 1.7 – 2.3 V                                                 |
| Lifetime                           | 20 Years                                                    |
| Capacity Factor ( $c_f$ )          | Depending on the electricity source                         |
| <u>Electrolyser Capital Cost</u>   |                                                             |
| Reference costs                    | DoE: \$342 kW <sup>-1</sup>                                 |
| <u>Electrolyser Operating Cost</u> |                                                             |
| Electricity Consumption cost       | \$97 MWh <sup>-1</sup> - (Grid – $c_f$ :97%)                |
|                                    | \$53MWh <sup>-1</sup> - (Grid – $c_f$ :51%)                 |
|                                    | \$68 MWh <sup>-1</sup> - (Solar PPA – $c_f$ :18%)           |
| Nitrate Consumption Cost           | \$315 ton <sup>-1</sup> of NO <sub>x</sub>                  |
| Water Consumption Cost             | \$0.02 L <sup>-1</sup>                                      |
| Electrolyser O&M)                  | 3.2% of electrolyser capital cost per year                  |
| Stack Replacement                  | 15% of electrolyser capital cost per replacement            |



**Table S2.** EXAFS fitting results of FSP CuO.

| path | N     | $\sigma^2$ (Å <sup>2</sup> ) | R (Å) | R factor |
|------|-------|------------------------------|-------|----------|
| O    | 1.948 | 0.00202                      | 1.952 | 0.0083   |
| Cu   | 4.000 | 0.01906                      | 2.906 |          |

**Table S3.** EXAFS fitting results for pCuO-5.

| path | N     | $\sigma^2$ (Å <sup>2</sup> ) | R (Å) | R factor |
|------|-------|------------------------------|-------|----------|
| O    | 2.136 | 0.0074                       | 1.960 | 0.0073   |
| Cu   | 3.652 | 0.022                        | 2.881 |          |

## 5. References

- 1 G. Kresse and D. Joubert, *Phys. Rev. B*, 1999, **59**, 1758–1775.
- 340 2 G. Kresse and J. Hafner, *Phys. Rev. B*, 1994, **49**, 14251–14269.
- 3 G. Kresse and J. Furthmu, *Phys. Rev. B*, 1996, **54**, 11169–11186.
- 4 J. P. Perdew, K. Burke and M. Ernzerhof, *Phys. Rev. Lett.*, 1996, **77**, 3865–3868.
- 5 A. a. Peterson, F. Abild-Pedersen, F. Studt, J. Rossmeisl and J. K. Nørskov, *Energy Environ. Sci.*, 2010, **3**, 1311.
- 6 Y. Zhou, W. Chen, P. Cui, J. Zeng, Z. Lin, E. Kaxiras and Z. Zhang, *Nano Lett.*, 2016, **16**, 6058–6063.
- 345 7 S. Guo, K. Heck, S. Kasiraju, H. Qian, Z. Zhao, L. C. Grabow, J. T. Miller and M. S. Wong, *ACS Catal.*, 2018, **8**, 503–515.
- 8 M. Jouny, W. Luc and F. Jiao, *Ind. Eng. Chem. Res.*, 2018, **57**, 2165–2177.
- 9 J. Na, B. Seo, J. Kim, C. W. Lee, H. Lee, Y. J. Hwang, B. K. Min, D. K. Lee, H. S. Oh and U. Lee, *Nat. Commun.*, , DOI:10.1038/s41467-019-12744-y.
- 10 D. Peterson, J. Vickers and D. DeSantis, *DOE Hydrog. Fuel Cells Progr. Rec.*
- 350 11 IEA, *Energy Prices 2020*, IEA, Paris, 2020.
- 12 */publications/2020/Jun/Renewable-Power-Costs-in-2019*.
- 13 K. Jiang, H. Yu, L. Chen, M. Fang, M. Azzi, A. Cottrell and K. Li, *Appl. Energy*, 2020, **260**, 114316.
- 14 United States Environmental Protection Agency, in *Draft U.S. Greenhouse Gas Emissions and Sinks (1990 - 2019)*, EPA, Washington, DC, EPA 430-R-., 2021.
- 355 15 W. and the E. Australian Government Department of Agriculture, National Pollutant Inventory.
- 16 IEA, *World Energy Outlook 2019*, IEA, Paris, 2019.
- 17 X.-Z. Feng, O. Lugovoy and H. Qin, *Adv. Clim. Chang. Res.*, 2018, **9**, 34–42.
- 18 S. Zhang, H. Ren, W. Zhou, Y. Yu and C. Chen, *J. Clean. Prod.*, 2018, **185**, 761–771.
- 19 P. Cavaliere and A. Silvello, *Ironmaking and Steelmaking Processes*, Springer, 2016, vol. 173.
- 360 20 IEA, Emissions of Nitrogen oxyde (NOx) by sector and scenario, 2015 and 2040.
- 21 G. F. Chen, Y. Yuan, H. Jiang, S. Y. Ren, L. X. Ding, L. Ma, T. Wu, J. Lu and H. Wang, *Nat. Energy*, 2020, **5**, 605–613.
- 22 T. Komagai, Japan to introduce ammonia for thermal power, shipping fuels in late 2020s.
- 23 H. Kobayashi, A. Hayakawa, K. D. K. A. Somarathne and E. C. Okafor, *Proc. Combust. Inst.*, 2019, **37**, 109–133.
- 24 D. Kim, D. Shin, J. Heo, H. Lim, J.-A. Lim, H. M. Jeong, B.-S. Kim, I. Heo, I. Oh, B. Lee, M. Sharma, H. Lim, H. Kim and
- 365 Y. Kwon, *ACS Energy Lett.*, 2020, 3647–3656.
- 25 J. M. McEnaney, S. J. Blair, A. C. Nielander, J. A. Schwalbe, D. M. Koshy, M. Cargnello and T. F. Jaramillo, *ACS Sustain. Chem. Eng.*, 2020, **8**, 2672–2681.
- 26 Y. Sun, E. Zwolińska and A. G. Chmielewski, *Crit. Rev. Environ. Sci. Technol.*, 2016, **46**, 119–142.
- 27 J. Husebye, A. L. Brunsvold, S. Roussanaly and X. Zhang, *Energy Procedia*, 2012, **23**, 381–390.
- 370 28 S. Roussanaly and R. Anantharaman, *Chem. Eng. J.*, 2017, **327**, 618–628.
- 29 W. Kuckshinrichs and S. Vögele, eds. W. Kuckshinrichs and J.-F. Hake, Springer International Publishing, Cham, 2015, pp. 147–171.
- 30 J. Sun, D. Alam, R. Daiyan, H. Masood, T. Zhangb, R. Zhoub, P. J., Cullen, Emma C. Lovell, A. (Rouhollah) Jalili and R. Amal, *Energy Environ. Sci.*, , DOI:10.4135/9781446247501.n1321.
- 375 31 S. Giddey, S. P. S. Badwal and A. Kulkarni, *Int. J. Hydrogen Energy*, 2013, **38**, 14576–14594.
- 32 ARPA A-E, *Renewable Energy to Fuels Through Utilization of EnergyDense Liquids (REFUEL)*, 2016.
- 33 N. Lazouski, M. Chung, K. Williams, M. L. Gala and K. Manthiram, *Nat. Catal.*, 2020, **3**, 463–469.
- 34 M. Jung, J. N. Hart, J. Scott, Y. H. Ng, Y. Jiang and R. Amal, *Appl. Catal. A Gen.*, 2016, **521**, 190–201.
- 35 P. Keil, D. Lützenkirchen-Hecht and R. Frahm, *AIP Conf. Proc.*, 2007, **882**, 490–492.
- 380 36 C. G. R. Eaton and D. G. Gorenstein, *Bull. Magn. Reson.*, 1988, **10**, 130.
